# Supplementary material
Source: PubMed Central journal article supplement (PMC4417063)
Supplement: NIHMS670571-supplement-125_2015_3546_MOESM2_ESM.pdf [file NIHMS670571-supplement-125_2015_3546_MOESM2_ESM.pdf]

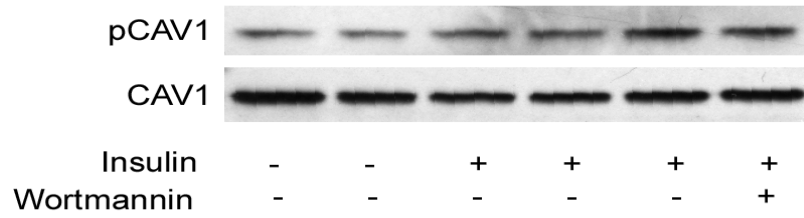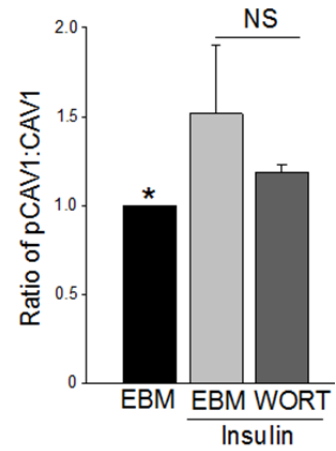

**1(a)**

**1(b)**

**ESM Figure 1: Effects of wortmannin on insulin-induced Tyr<sup>14</sup>-caveolin-1 phosphorylation.** Cultured bAECs were serum-starved for 24 h then treated with insulin in presence or absence of wortmannin (WORT). **1(a)**, a representative blot from four independent experiments. **1(b)**, mean values for the ratio of phospho-caveolin-1(pCAV1) to total caveolin-1(CAV1). \* p<0.05 compared to remaining groups. NS: statistically not significant. EBM (basal medium only).
